# Supplementary material for: Keplerate-type polyoxometalate/semiconductor composite electrodes with light-enhanced conductivity towards highly efficient photoelectronic devices
Source: Royal Society of Chemistry journal article supplement (doi:10.1039/c6ta03853k), 2016-01-01
Supplement: c6ta03853k1.pdf [file c6ta03853k1.pdf]

## Supporting Information

### **Keplerate-type Polyoxometalate/Semiconductor Composite Electrode with Light-enhanced Conductivity towards High Efficient Photoelectronic Devices**

Shasha Xu,<sup>‡a</sup> Yanhua Wang,<sup>‡a</sup> Yue Zhao,<sup>c</sup> Weilin Chen,<sup>\*a</sup> Jiabo Wang,<sup>a</sup> Lifei He,<sup>a</sup>  
Zhongmin Su,<sup>a</sup> Enbo Wang<sup>\*a</sup> and Zhenhui Kang<sup>\*b</sup>

<sup>a</sup>Key laboratory of Polyoxometalate Science of Ministry of Education, Department of Chemistry, Northeast Normal University, Renmin Street No.5268, Changchun, Jilin, 130024, P. R. China. E-mail: chenwl@nenu.edu.cn, wangeb889@nenu.edu.cn, Tel: +86-431-85098787.

<sup>b</sup>Institute of Functional Nano and Soft Materials (FUNSOM) & Jiangsu Key Laboratory for Carbon-Based Functional Materials and Devices, Soochow University 199 Ren-Ai Road, Suzhou 215123, China. E-mail: [zhkang@suda.edu.cn](mailto:zhkang@suda.edu.cn)

<sup>c</sup>Department of Vascular Surgery, The China-Japan Union Hospital of Jilin University, Changchun, 130033, China

<sup>‡</sup>These two authors are equally contributed to this paper.

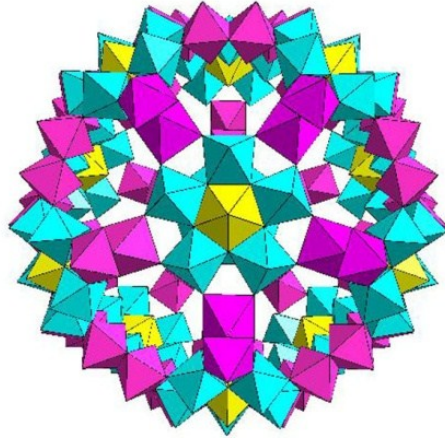

**Fig. S1** The structure of  $\{\text{Mo}_{132}\}$  with perspective view along  $a$  fivefold symmetry axis (yellow:  $\text{MoO}_7$ , blue:  $\{\text{MoO}_6\}$  groups, purple:  $\{\text{MoV}_2\}$ ).

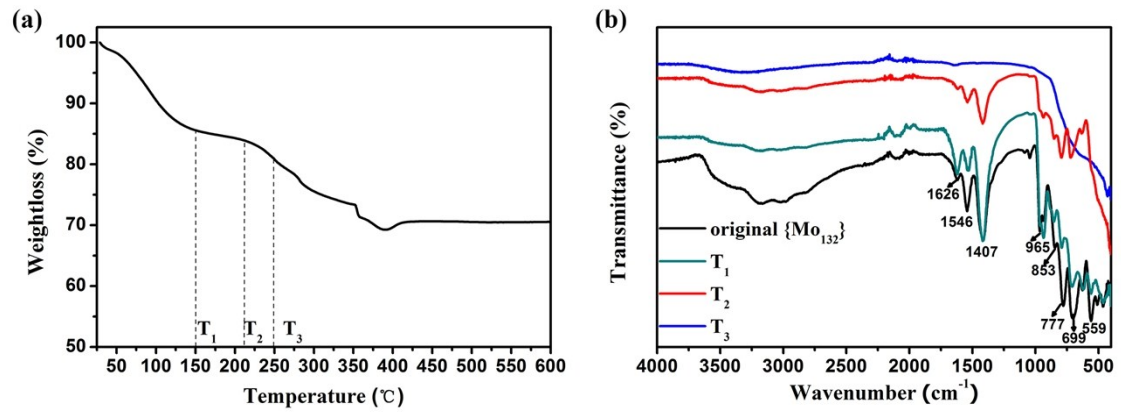

**Fig. S2** (a) TG curve of  $\{\text{Mo}_{132}\}$ . (b) The IR spectra under different temperature (150, 210 and 250 °C for  $T_1$ ,  $T_2$  and  $T_3$ , respectively).

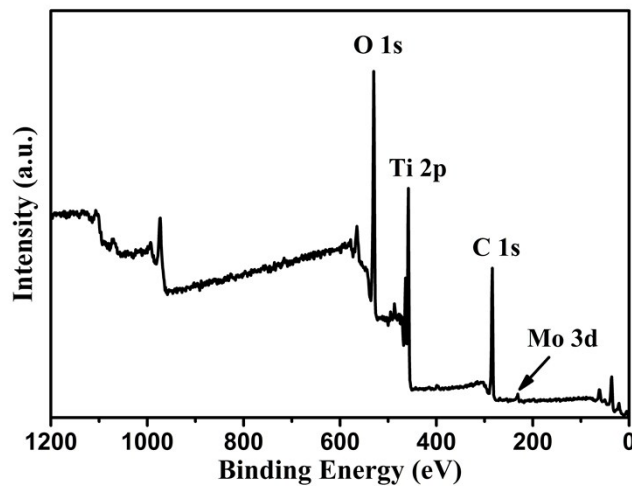

**Fig. S3** The XPS survey spectrum of 5%  $\{\text{Mo}_{132}\}/\text{TiO}_2$ .

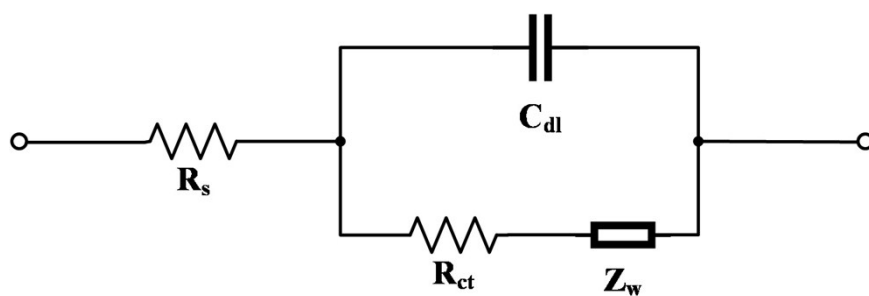

**Fig. S4** Equivalent circuit used to fit the impedance measurements for the surface-modified electrode. ( $R_s$  is the solution resistance,  $R_{ct}$  is the charge transfer resistance,  $Z_w$  is the warburg element and  $C_{dl}$  is the double layer capacitance.)

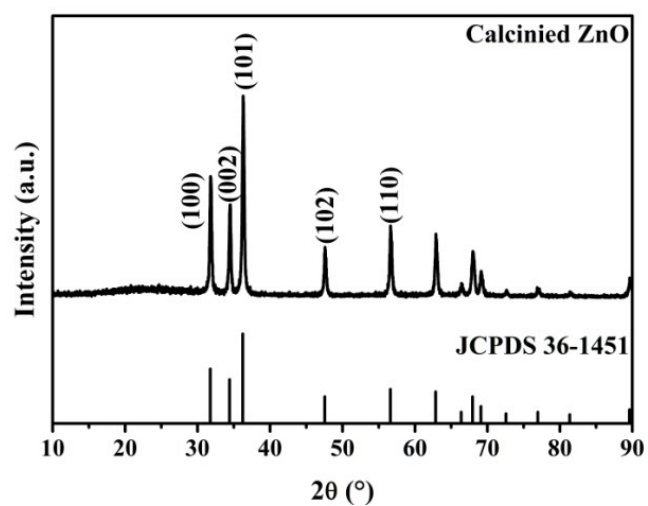

**Fig. S5** XRD patterns of calcined ZnO.

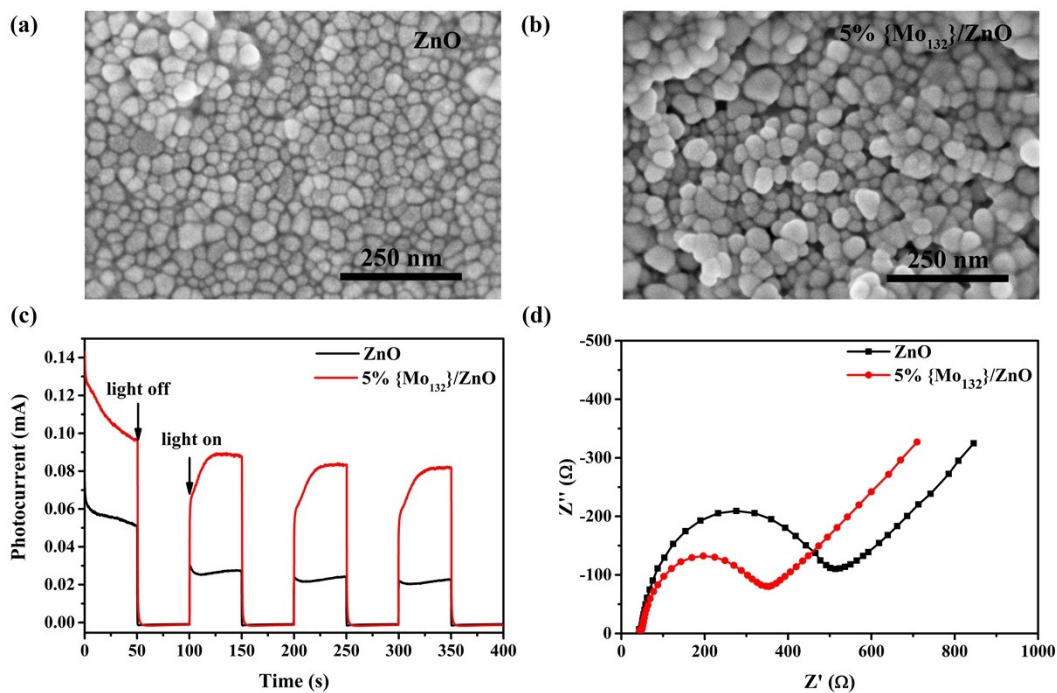

**Fig. S6** (a) The SEM graph of ZnO. (b) The SEM graph of 5%{Mo<sub>132</sub>}/ZnO film electrodes. (c) Photocurrent responses of ZnO and 5%{Mo<sub>132</sub>}/ZnO. (d) Nyquist plots of ZnO and 5%{Mo<sub>132</sub>}/ZnO. (red line: 5%{Mo<sub>132</sub>}/ZnO, black line: ZnO)

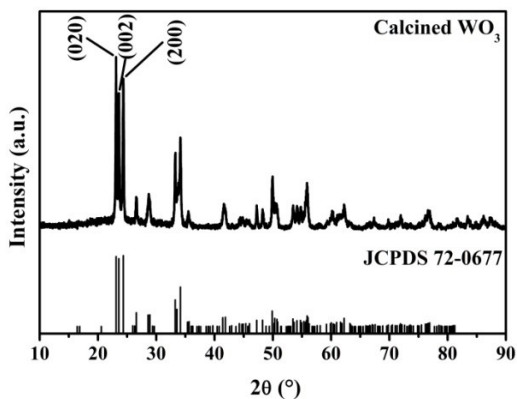

**Fig. S7** XRD patterns of calcined WO<sub>3</sub>.

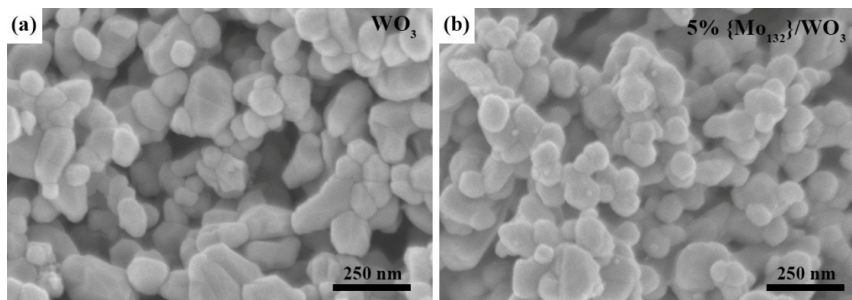

**Fig. S8** SEM graphs of WO<sub>3</sub> and 5%{Mo<sub>132</sub>}/WO<sub>3</sub> film electrodes.

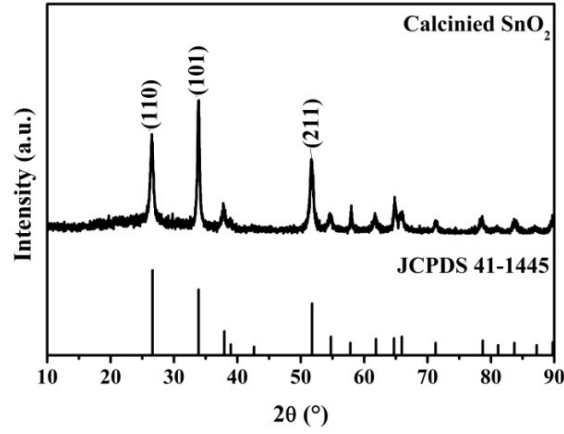

**Fig. S9** XRD patterns of calcined SnO<sub>2</sub>.

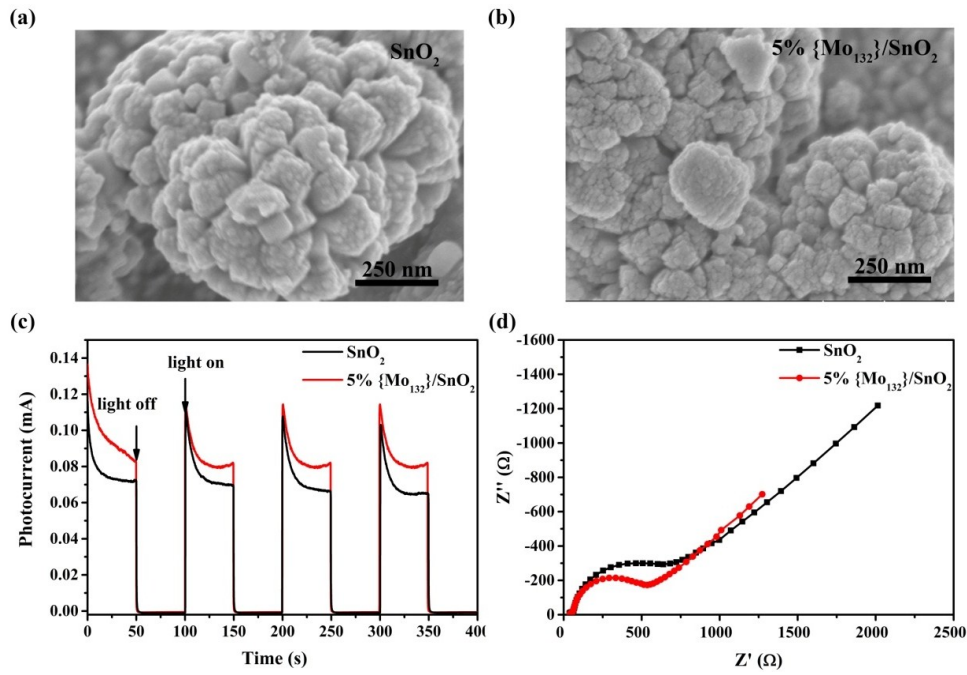

**Fig. S10** (a) The SEM graph of SnO<sub>2</sub>. (b) The SEM graph of 5%{Mo<sub>132</sub>}/SnO<sub>2</sub> film electrodes. (c) Photocurrent responses of SnO<sub>2</sub> and 5%{Mo<sub>132</sub>}/SnO<sub>2</sub>. (d) Nyquist plots of SnO<sub>2</sub> and 5%{Mo<sub>132</sub>}/SnO<sub>2</sub>. (red line: 5%{Mo<sub>132</sub>}/ SnO<sub>2</sub>, black line: SnO<sub>2</sub>)

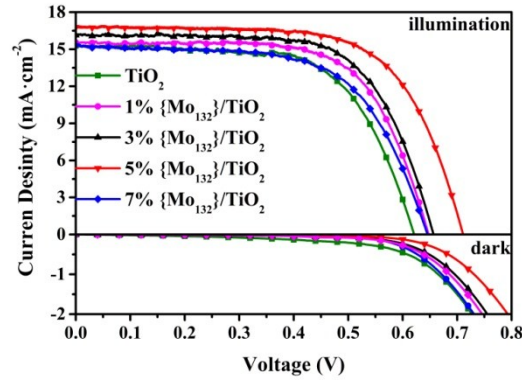

**Fig. S11**  $J$ - $V$  curves of the DSSCs with different proportions of  $\{\text{Mo}_{132}\}/\text{TiO}_2$  and pure  $\text{TiO}_2$  as the photoanodes. (green: pure  $\text{TiO}_2$ , pink: 1% $\{\text{Mo}_{132}\}/\text{TiO}_2$ , black: 3% $\{\text{Mo}_{132}\}/\text{TiO}_2$ , red: 5% $\{\text{Mo}_{132}\}/\text{TiO}_2$ , blue: 7% $\{\text{Mo}_{132}\}/\text{TiO}_2$ )

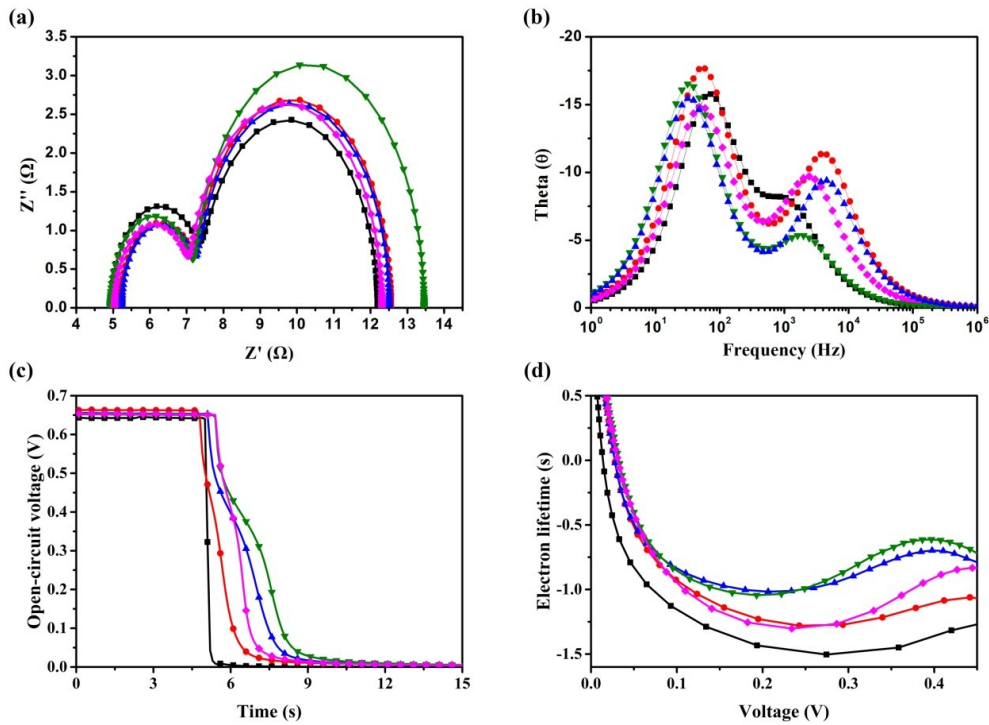

**Fig. S12** (a) Nyquist plots. (b) Bode phase plots. (c) OCVD curves of different DSSCs. (d) Electron lifetime calculated from OCVD. (black: pure  $\text{TiO}_2$ , red: 1% $\{\text{Mo}_{132}\}/\text{TiO}_2$ , blue: 3% $\{\text{Mo}_{132}\}/\text{TiO}_2$ , green: 5% $\{\text{Mo}_{132}\}/\text{TiO}_2$ , pink: 7% $\{\text{Mo}_{132}\}/\text{TiO}_2$ )

**Table S1** Photovoltaic parameters of different DSSCs.

| Percentage | $J_{sc}(\text{mA cm}^{-2})$ | $V_{oc}(\text{V})$ | $FF$              | $\eta(\%)$      |
|------------|-----------------------------|--------------------|-------------------|-----------------|
| 0          | $15.28 \pm 0.01$            | $0.621 \pm 0.003$  | $0.638 \pm 0.020$ | $6.06 \pm 0.04$ |
| 1          | $15.54 \pm 0.02$            | $0.648 \pm 0.004$  | $0.669 \pm 0.010$ | $6.73 \pm 0.02$ |
| 3          | $16.14 \pm 0.01$            | $0.657 \pm 0.003$  | $0.668 \pm 0.030$ | $7.08 \pm 0.03$ |
| 5          | $16.78 \pm 0.02$            | $0.711 \pm 0.002$  | $0.666 \pm 0.020$ | $7.94 \pm 0.01$ |
| 7          | $15.33 \pm 0.02$            | $0.646 \pm 0.004$  | $0.623 \pm 0.010$ | $6.17 \pm 0.02$ |

**Table S2** The corresponding parameters of different DSSCs obtained from electrochemical impedance spectroscopy.

| Percentage | $R_1(\Omega)$ | $R_2(\Omega)$ | $f_{max}$ (Hz) | $\tau_e(\text{ms})$ |
|------------|---------------|---------------|----------------|---------------------|
| 0          | 2.23          | 4.86          | 72.20          | 2.21                |
| 1          | 2.14          | 5.32          | 52.82          | 3.02                |
| 3          | 2.18          | 5.61          | 33.14          | 4.81                |
| 5          | 2.07          | 6.26          | 31.10          | 5.12                |
| 7          | 2.28          | 5.04          | 48.06          | 3.32                |

**Note:** The mean electron lifetime ( $\tau_e$ ) can be got from the relation:  $\tau_e = (2\pi f_{max})^{-1}$ .  $f_{max}$  is the frequency at the top of the intermediate frequency arc.
